1                    **Children cooperate more successfully with non-kin than with siblings**

2

3 Gladys Barragan-Jason<sup>1\*</sup>, Maxime Cauchoix<sup>1</sup>, Anne Regnier<sup>1</sup>, Marie Bourjade<sup>2</sup>, Astrid

4 Hopfensitz<sup>3</sup> & Alexis S. Chainé<sup>1,3</sup>

5 <sup>1</sup>Station d'Ecologie Théorique et Expérimentale du CNRS (UMR5321), 09200, Moulis,

6 France

7 <sup>2</sup>CLLE, Université de Toulouse, CNRS, 31000, Toulouse, France

8 <sup>3</sup>Toulouse School of Economics, Institute for Advanced Studies in Toulouse, 31000,

9 Toulouse, France

10 \* *Corresponding Author*: Gladys Barragan-Jason

11 Cooperation plays a key role in advanced societies with human cooperation among kin being  
12 more prominent than cooperation among non-kin. However, little is known about the  
13 developmental roots of kin and non-kin cooperation in humans. Here, we show for the first  
14 time that children cooperated less successfully with siblings than with non-kin children,  
15 whether or not non-kin partners were friends. Furthermore, children with larger social  
16 networks cooperated better and the perception of friendship among non-friends improved  
17 after cooperating. These results indicate that non-kin cooperation in humans has deep  
18 developmental foundations which might serve to forge and extend non-kin social  
19 relationships during middle childhood and create opportunities for future collaboration  
20 beyond kin. Our results provide a new framework for future studies focusing on how and why  
21 cooperation with different classes of partners may change during development in humans as  
22 well as other long-lived organisms.

23 Cooperation is thought to have played a key role in the evolution of advanced  
24 societies, especially in humans<sup>1-7</sup>. Both kin-based interactions and reciprocity can promote  
25 cooperation<sup>2-6</sup>. Cooperation among kin can mean that benefits to the recipient of help can  
26 lead to indirect genetic benefits to the donor, an evolutionary process called “kin-selection”<sup>8</sup>,  
27 as described in social insects<sup>9,10</sup> and a number of vertebrates<sup>11,12</sup>. Alternatively (or  
28 additionally), unrelated individuals who interact repeatedly, recognize each other, and  
29 remember their interactions can *reciprocate* leading to benefits to each individual in the  
30 partnership across time<sup>13,14</sup> such as egg trading in fish<sup>15,16</sup> and allogrooming in primates<sup>17</sup>.  
31 In a few cases, both mechanisms might operate in tandem. For example, food sharing in  
32 vampire bats is clearly maintained by reciprocity even if such sharing can occur among kin  
33 adding further indirect benefits<sup>18-20</sup>. Likewise, cooperation in humans occurs both among kin  
34<sup>21,22</sup> as well as through reciprocal interactions<sup>6,23-27</sup>, although human adults clearly favor kin  
35 over strangers<sup>28-31</sup>.

36 Studying the developmental foundations of kin and non-kin cooperation is critical to  
37 our understanding of the evolution and function of cooperation in longer-lived organisms and  
38 their role in the development and evolution of advanced societies<sup>7,32</sup>, yet appropriate tests in  
39 humans are still lacking. Among the limited number of experimental studies looking at  
40 cooperation or prosociality in children, reciprocation seems to be important<sup>33-36</sup> but children  
41 tend to favor sharing with their relatives compared to strangers<sup>37,38</sup> like adults. However,  
42 previous experimental studies of kin-sharing in children use third party tasks, where subjects  
43 are asked about abstract scenarios, which often give different results from direct participation  
44 in a task<sup>39,40</sup> since it reflects what the participant thinks another person should do but not  
45 necessarily how they would actually behave in a real cooperative situation. In addition, third  
46 party tasks are thought to be “removed from the evolutionary mechanisms that [...] likely  
47 shape these phenomena in early ontogeny” and do not “reflect the effects of the collaborative

48 foraging context of early humans, in which one shares the spoils [...] among those who took  
49 part in the *collaborative effort*"<sup>40</sup>. Because no experimental study has directly evaluated kin  
50 cooperation in situations in which individuals are asked to actively cooperate in a realistic  
51 setting, little is known about the developmental roots of kin cooperation in humans.

52 Here, we used a direct-action cooperation task to evaluate if children cooperate more  
53 with kin, friends, or non-friends. We measured cooperation using a rope pulling task (Fig.  
54 1A) in which two children coordinate in pulling a single rope to reach a reward and succeed  
55 only if both rope ends are pulled at the same time and speed<sup>41-43</sup>. This task is complex and  
56 needs the active engagement of children in the task since it requires paying attention to the  
57 partners' actions to succeed. While a previous experiment using this design began by giving  
58 the children a demonstration, we decided to render the task more difficult by omitting the  
59 demonstration and merely telling the children that they would have to work together to  
60 complete the task<sup>43</sup>. To examine the roles of kinship and friendship on performance by  
61 children of a cooperative task, we assigned each child a partner who could be classified as kin  
62 (a sibling), a socially close non-kin (a "best friend," or a socially distant non-kin). Pairs were  
63 assigned by the experimenter based on questionnaires administered to teachers and children  
64 before the task and each pair was allowed to conduct the task until successful or up to three  
65 attempts if unsuccessful. In so doing, we investigated whether success in a cooperative task  
66 was linked to the degree of relatedness between partners in children.

67 Overall, 61% of pairs succeeded in the rope pulling task with 131 successful trials  
68 over 215 total trials performed by 145 different pairs of 290 children. Sixty-three percent  
69 (91/145) of the pairs succeeded in the first trial, 21% (31/145) in the second trial, 6% (9/145)  
70 during the third trial, and 10% (14/145) of dyads did not succeed by the 3 trial. Overall  
71 performance in the rope pulling task was affected by the age ( $F=8.02$ ;  $P=0.006$ ) of the  
72 participant but not by other socio-demographic variables (binomial GLMM on overall

73 performance including age, parents' income, number of siblings, sex and rural vs. urban  
74 environment as fixed effects and Participant and Dyad identity as random effects, see  
75 supplementary information; supplementary methods, Table S1 and Table S2).

76 With direct interaction in a challenging task, we found that children readily cooperate  
77 with all categories of partners just like adults. However, contrary to what was observed in  
78 adults<sup>21,22,44</sup>, we found that children cooperate less well with kin than with non-kin (Fig. 1B).  
79 Kin dyads required more trials to succeed on average compared to non-kin dyads (ordered  
80 LM: friends vs. kin:  $t=-2.17$ ;  $P=0.029$  and non-friends vs. kin:  $t=-2.22$ ;  $P=0.026$ ) while  
81 controlling for mean age, age difference and sex (Male-Male, Female-Female and Female-  
82 Male) of dyads (ordered LM: mean age:  $t=-3.38$ ;  $P=0.000$ ; age difference:  $t=-1.21$ ;  $P=0.22$ ;  
83 sex:  $t=1.20$ ;  $P=0.23$ ; Table S3 in SI). Similarly, the likelihood of cooperating during the very  
84 first trial was also significantly affected by dyad type while controlling for mean age, age  
85 difference and sex of dyads (binomial GLM, partner status: deviance=7.95;  $P=0.019$ , mean  
86 age: deviance=7.29;  $P=0.007$ ; age difference: deviance=2.99;  $P=0.084$ , sex: deviance=0.43;  
87  $P=0.81$ ; Fig. 1B and Table S4) with friends (52 dyads, 71% successful;  $z=2.62$ ;  $P=0.008$ )  
88 and non-friends (54 dyads, 68 % successful,  $z=2.29$ ;  $P=0.021$ ) more likely to succeed on their  
89 first cooperative trial than kin partners (39 dyads, 44%) whereas performance of friends and  
90 non-friends did not differ from each other ( $z=-0.61$ ;  $P=0.54$ ; Fig. 1B).

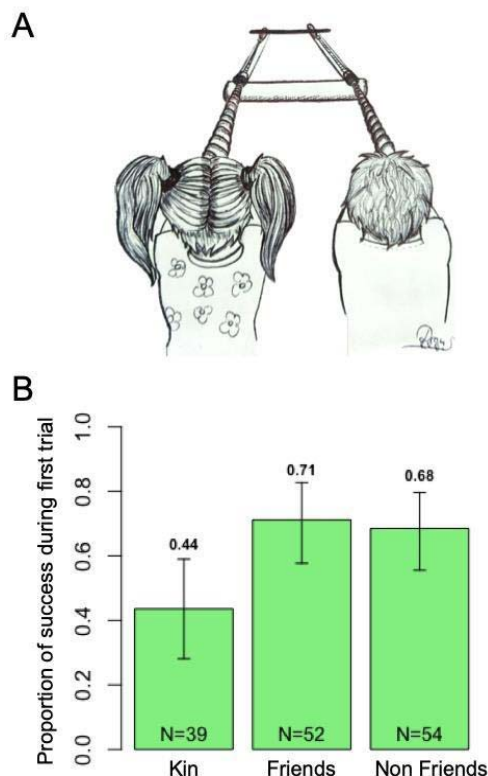

91

92 *Fig. 1. Performance in the cooperative rope pulling task by partner status. A) Illustration of*  
93 *the cooperation apparatus. The "rope pulling game" was adapted from previous studies on*  
94 *chimpanzees and children*<sup>43,45</sup>*. Photograph of the apparatus is also provided in Fig. S1 in*  
95 *supplemental information (SI). B) Proportion of successful first trials of kin (i.e. siblings) and*  
96 *non-kin friend and non-friend dyads in cooperative rope pulling. Error bars indicate 95%*  
97 *bootstrapped confidence interval. N values indicate the number of dyads in each category*  
98 *(i.e. kin, friends, non-friends).*

99

100 The contrast in the propensity to cooperate with kin relative to non-kin between  
101 studies in adults and our results in children suggest that there is a striking developmental shift  
102 in the value of different forms of interactions. While we did find an improvement in success  
103 in the cooperative task with age, this improvement did not alter patterns of cooperation  
104 between kin versus non-kin while controlling for dyad age suggesting that contrasts between  
105 children and adults in their preference for cooperating with kin are not simply due to an  
106 improvement of solving a cooperative task.

107 More likely, the value of cooperating with different classes of individuals shifts with  
108 age. Kin cooperation among adults might provide the greatest direct and indirect benefits to  
109 success (e.g., fitness, wealth, etc. <sup>46</sup>) since they have reached reproductive maturity where  
110 gene transmission is likely more important than reciprocity thereby favoring kin interactions  
111 and indirect genetic benefits from cooperation. On the other hand, children are far from  
112 reproductive age and therefore might invest primarily in resource acquisition and survival  
113 which can benefit from reciprocal cooperation with peers regardless of kinship. Furthermore,  
114 kin-competition might reduce the value of kin-cooperation among children (e.g. siblings) <sup>47-49</sup>  
115 especially if resources are primarily provided by parents <sup>40</sup>. The benefits of a given  
116 cooperative interaction to success in children are indeed modest given that children are still  
117 supported by their parents and instead may serve primarily to develop cooperative skills  
118 needed for the future such as building a social network.

119 Developing friendships and affiliations with peers in mid-childhood has indeed been  
120 linked to future success at adulthood <sup>46,50,51</sup>. Since the current network of young children is  
121 still fairly limited, reinforcing and increasing reputation through reciprocity and building a  
122 broader social network might thus be more important during childhood than adulthood.  
123 Indeed, social networks tend to expand in size among young adults, but shrink in older adults  
124 <sup>52</sup>. Here, we found that having a bigger social network before the experiment was related to  
125 subsequent performance during the first trial in the rope pulling task (Fig. 2) after controlling  
126 for the age difference between partners, mean age, sex and number of children in the  
127 classroom (binomial GLM, out degree centrality or number of friends named by participants:  
128 deviance=5.61; P=0.018, mean age: deviance=10.27; P=0.001; age difference:  
129 deviance=3.14; P=0.076, sex: deviance=2.12; P=0.35; number of children in the classroom:  
130 deviance=1.12; P=0.29; Fig. 3, Fig. 2, Table S5 and Fig. S3). This correlative relationship  
131 could exist either because social individuals cooperate more readily or because those who

132 have built a bigger network develop cooperative skills. Regardless of directionality, our  
133 results show a cooperative benefit to a larger social network.  
134

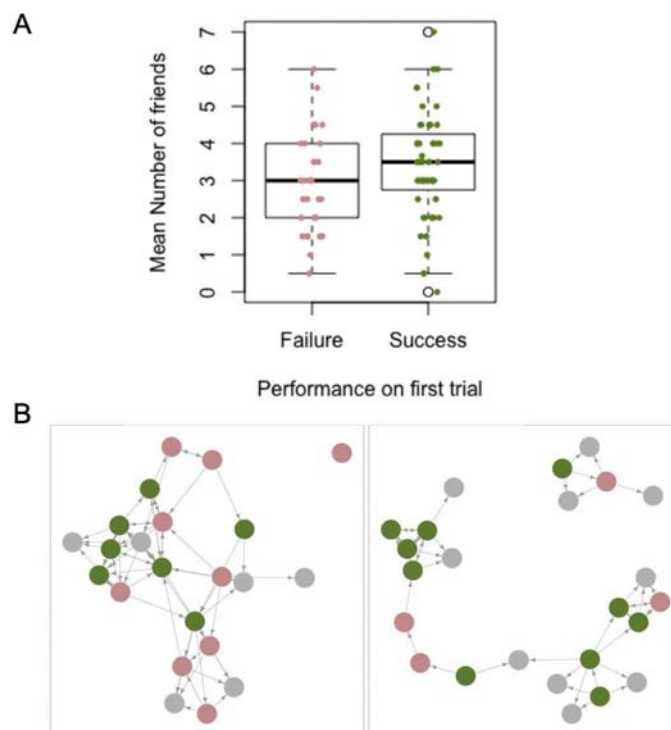

135

136 *Fig. 2. Relationship between the number of friends (out degree centrality) and performance*  
137 *in the rope pulling task. The number of friends and social network were based on a*  
138 *questionnaire before the experiment where children were asked to give the names of children*  
139 *they prefer to play with in their classroom including children who did not participate in the*  
140 *task. A) Boxplots contrasting the number of friends averaged between the two partners*  
141 *according to their performance during the first trial. Failure in the first trial is shown in red*  
142 *and success in green. Each dot represents a dyad of children. B) Examples of two classroom*  
143 *networks in which individuals who succeeded in the first trial appear in green and who failed*  
144 *in red. Children who did not participate and who participants named as friends appear in*  
145 *grey. Arrows represent friendship between children such that bi-directional arrows represent*  
146 *pairs of individuals who each listed the other as a friend whereas single headed arrows*  
147 *represent cases where one individual considered the other a friend while the second*  
148 *individual did not list the first as a friend. All networks are presented in Fig. S2.*

149

150 Building a large social network should be especially valuable in unpredictable  
151 environments, since extending one's social network to cooperate with non-kin could provide  
152 benefits when the social community is perturbed whereas limiting one's social network only



153 to kin would be risky<sup>18,19</sup>. For example, under unpredictable situations<sup>19</sup> or when non-kin are  
154 more numerous than kin<sup>18</sup>, bats tend to favor cooperation with non-kin compared to kin  
155 partners<sup>19</sup>. For children, the school environment is constituted mostly of non-kin and has  
156 some risks (e.g. victimization by peers<sup>53-55</sup>) so expansion of the social network could indeed  
157 carry “social bet hedging” benefits. If cooperation serves to strengthen or build a social  
158 network, we would predict that participation in a cooperative action should alter future  
159 interactions. As such, we investigated whether performing the rope pulling task subsequently  
160 modified the relationship between the two partners. To do so, children were asked to rate  
161 their relationship with their partner before and again one day after the cooperative task (Fig.  
162 3) using a Yes/No preference test (“Do you like to play with CHILD X?”; Fig. 3A) and an  
163 emoticon Likert scale (“How much do you like to play with CHILD X? A lot, a little, not at  
164 all”; Fig. 3B). While there was no change in how much children liked kin partners (Yes/No  
165 preference test: McNemar  $\chi^2(1,25)=1.33$ ;  $P=0.25$ ; emoticon Likert scale: Cochran  
166  $Q(1,25)=1.80$ ;  $P=0.18$ ; Fig. 4) and friend partners (Yes/No preference test: McNemar  
167  $\chi^2(1,49)=1$ ;  $P=1$ ; emoticon Likert scale: Cochran  $Q(1,49)=2.78$ ;  $P=0.10$ ; Fig. 3) after the  
168 task, we found that the relationship quality of non-friends improved after performing the rope  
169 pulling task together in both the Yes/No preference scale (McNemar  $\chi^2(1,56)=9.60$ ;  $P=$   
170  $0.002$ ; Fig. 3A) and the Emoticon Likert scale (Cochran  $Q(1,55)=7.35$ ;  $P=0.007$ ; Fig. 3B).

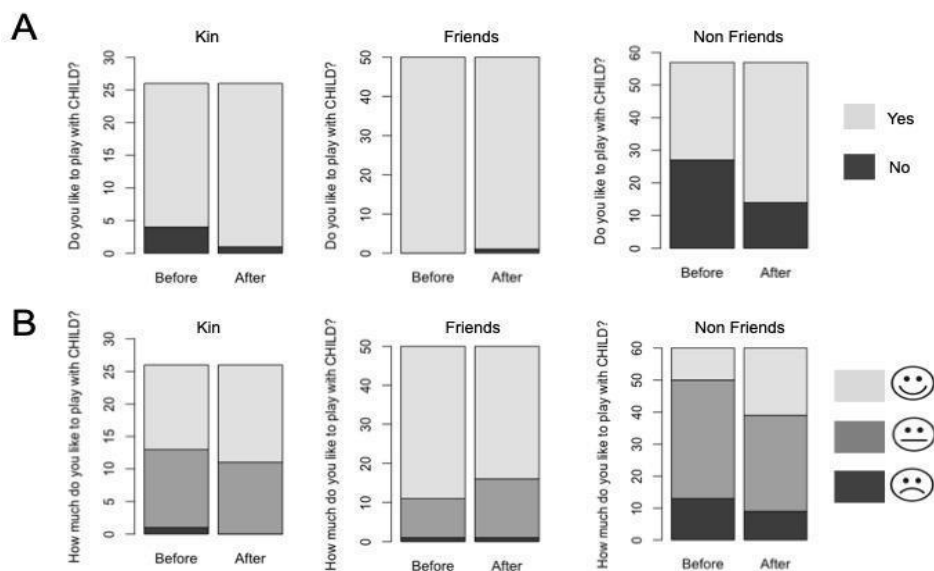

171

172 *Fig. 3. Effect of the cooperative task on the relationship quality between kin, friend and non-*  
 173 *friend partners. A) Results from the Yes/No preference scale in which children were asked to*  
 174 *answer the following question, before and after the rope pulling task: “Do you like to play*  
 175 *with CHILD X?”. “Yes” responses appear in light grey and “No” responses in dark grey. B)*  
 176 *Responses from the Emoticon Likert scale during which children were asked to rate how*  
 177 *much they like to play with their partner twice (before and after the rope pulling task). They*  
 178 *can either respond “A lot” in light grey, “a little” in medium grey or “not at all” in dark*  
 179 *grey while pointing a “smiley scale” corresponding to each level.*

180

181 Overall, our results show that cooperation between non-kin partners plays a key role  
 182 during childhood which we argue serves to expand a child’s social network since non-friends  
 183 had a more positive view of their partner after interacting during the cooperative task. These  
 184 results contrast with two studies in which children had to choose how to allocate resources  
 185 between dolls (i.e. third party tasks with fictional characters) which both showed greater  
 186 apparent cooperation with kin than friends or strangers<sup>37,56</sup>. We believe that differences in  
 187 experimental methods lead to this contrast since the use of fictional characters is more likely  
 188 to elicit a response that reflects what children think they or others *should* do<sup>39,57</sup> whereas  
 189 direct interactions to cooperate in a face-to-face situation used in our experiments should  
 190 better reflect the actual outcome of natural cooperative situations. Furthermore, direct tasks  
 191 are more challenging than simple allocation tasks such that costs of cooperation could also

192 alter decisions. A difference in the value of friendships vs. sibling relationships among  
193 children relative to adults might drive contrasts in how much effort each group put into the  
194 cooperative task. The rope pulling task used here requires continued, active attention and  
195 coordination with a partner to succeed. Indeed, the number of gazes exchanged by the dyad in  
196 the current study was a strong predictor of success and kin displayed fewer gazes than other  
197 types of dyads as expected given that kin were less successful in the task (Supplemental  
198 information; Fig. S3). Given the difficulty of the cooperative task we conducted and  
199 considering the time children in western societies spend at school, we believe our results  
200 reflect an ecologically realistic measure<sup>58</sup> of cooperation in children.

201 Using this direct-action cooperation task, we found that children cooperate more with  
202 non-kin peers compared to siblings in direct contrast with results in adults. At what age shifts  
203 between cooperative strategies in children and adults occur remains an open question for  
204 future research. A more complete understanding of how decisions about cooperation shift  
205 through life will require both attention to the context of testing and application of similar  
206 direct-interaction tests in individuals from a broad age range. Whether such developmental  
207 shifts in cooperation are common in other organisms remains to be explored, but should exist  
208 in cases where the benefits of cooperating with different types of partners shifts through life  
209<sup>59</sup>. This new hypothesis motivated by our findings challenges our understanding of  
210 cooperation and should stimulate new research into cooperation across life stages in both  
211 humans and other social organisms.

212 **References**

- 213 1. Melis, A. P. & Semmann, D. How is human cooperation different? *Philos. Trans. R.*  
214 *Soc. Lond. B. Biol. Sci* **365**, 2663–2674 (2010).
- 215 2. Dugatkin, L. A. *Cooperation among animals: an evolutionary perspective*. (Oxford  
216 University Press on Demand, 1997).
- 217 3. West, S. A., Griffin, A. S. & Gardner, A. Social semantics: altruism, cooperation,  
218 mutualism, strong reciprocity and group selection. *J. Evol. Biol.* **20**, 415–432 (2007).
- 219 4. Clutton-Brock, T. Cooperation between non-kin in animal societies. *Nature* **462**, 51–  
220 57 (2009).
- 221 5. Sachs, J. L., Mueller, U. G., Wilcox, T. P. & Bull, J. J. The evolution of cooperation.  
222 *Q. Rev. Biol.* **79**, 135–160 (2004).
- 223 6. Fehr, E., Fischbacher, U. & Gächter, S. Strong reciprocity, human cooperation, and  
224 the enforcement of social norms. *Hum. Nat.* **13**, 1–25 (2002).
- 225 7. Boyd, R. & Richerson, P. J. Culture and the evolution of human cooperation. *Philos.*  
226 *Trans. R. Soc. Lond. B. Biol. Sci* **364**, 3281–3288 (2009).
- 227 8. Hamilton, W. D. The genetical theory of kin selection. *J. Theor. Biol.* **77**, 1–52  
228 (1964).
- 229 9. Queller, D. C. & Strassmann, J. E. Kin selection and social insects. *Bioscience* **48**,  
230 165–175 (1998).
- 231 10. Hughes, W. O. H., Oldroyd, B. P., Beekman, M. & Ratnieks, F. L. W.  
232 Ancestral monogamy shows kin selection is key to the evolution of eusociality. *Science*  
233 **320**, 1213–1216 (2008).
- 234 11. Emlen, S. T. & Wrege, P. H. The role of kinship in helping decisions among  
235 white-fronted bee-eaters. *Behav Ecol Sociobiol* **23**, 305–315 (1988).
- 236 12. Sinervo, B. *et al.* Self-recognition, color signals, and cycles of greenbeard

- 237 mutualism and altruism. *Proc Natl Acad Sci USA* **103**, 7372–7377 (2006).
- 238 13. Trivers, R. L. The evolution of reciprocal altruism. *Q. Rev. Biol.* **46**, 35–57  
239 (1971).
- 240 14. Axelrod, R. & Hamilton, W. D. The evolution of cooperation. *Science* **211**,  
241 1390–1396 (1981).
- 242 15. Petersen, C. W. Reproductive behavior, egg trading, and correlates of male  
243 mating success in the simultaneous hermaphrodite, *Serranus tabacarius*. *Environ. Biol.*  
244 *Fishes* **43**, 351–361 (1995).
- 245 16. Fischer, E. A. The relationship between mating system and simultaneous  
246 hermaphroditism in the coral reef fish, *Hypoplectrus nigricans* (Serranidae). *Animal*  
247 *Behaviour* **28**, 620–633 (1980).
- 248 17. Schino, G. & Aureli, F. The relative roles of kinship and reciprocity in  
249 explaining primate altruism. *Ecol. Lett.* **13**, 45–50 (2010).
- 250 18. Carter, G. G. & Wilkinson, G. S. Social benefits of non-kin food sharing by  
251 female vampire bats. *Proc. Biol. Sci.* **282**, (2015).
- 252 19. Carter, G. G., Farine, D. R. & Wilkinson, G. S. Social bet-hedging in vampire  
253 bats. *Biol. Lett.* **13**, (2017).
- 254 20. Carter, G. G. & Wilkinson, G. S. Food sharing in vampire bats: reciprocal help  
255 predicts donations more than relatedness or harassment. *Proc. Biol. Sci.* **280**, 20122573  
256 (2013).
- 257 21. Volland, B. The difference between kinship and friendship: (Field-)  
258 experimental evidence on trust and punishment. *J. Socio Econ.* **40**, 14–25 (2011).
- 259 22. Krupp, D., Debruine, L. & Barclay, P. A cue of kinship promotes cooperation  
260 for the public good. *Evol. Hum. Behav.* **29**, 49–55 (2008).
- 261 23. Milinski, M., Semmann, D. & Krambeck, H.-J. Reputation helps solve the

- 262 “tragedy of the commons”. *Nature* **415**, 424–426 (2002).
- 263 24. Forsythe, R., Horowitz, J. L., Savin, N. E. & Sefton, M. Fairness in Simple  
264 Bargaining Experiments. *Games Econ. Behav.* **6**, 347–369 (1994).
- 265 25. Wedekind, C. & Milinski, M. Cooperation through image scoring in humans.  
266 *Science* **288**, 850–852 (2000).
- 267 26. Reis, H. T. & Gruzen, J. On mediating equity, equality, and self-interest: The  
268 role of self-presentation in social exchange. *J. Exp. Soc. Psychol.* **12**, 487–503 (1976).
- 269 27. Haley, K. J. & Fessler, D. M. T. Nobody’s watching? *Evolution and Human*  
270 *Behavior* **26**, 245–256 (2005).
- 271 28. Smith, M. S., Kish, B. J. & Crawford, C. B. Inheritance of wealth as human  
272 kin investment. *Ethol. Sociobiol.* **8**, 171–182 (1987).
- 273 29. Stewart-Williams, S. Altruism among kin vs. nonkin: effects of cost of help  
274 and reciprocal exchange. *Evolution and Human Behavior* **28**, 193–198 (2007).
- 275 30. Berté, N. A. K’ekchi’ horticultural labor exchange: productive and  
276 reproductive implications. *Human reproductive behaviour* 83–96 (1988).
- 277 31. Crittenden, A. N., Conklin-Brittain, N. L., Zes, D. A., Schoeninger, M. J. &  
278 Marlowe, F. W. Juvenile foraging among the Hadza: Implications for human life history.  
279 *Evolution and Human Behavior* **34**, 299–304 (2013).
- 280 32. Carballo, D. M. *Cooperation and collective action: archaeological*  
281 *perspectives*. (University Press of Colorado, 2012).
- 282 33. Sebastián-Enesco, C., Hernández-Lloreda, M. V. & Colmenares, F. Two and a  
283 half-year-old children are prosocial even when their partners are not. *J. Exp. Child*  
284 *Psychol.* **116**, 186–198 (2013).
- 285 34. Warneken, F. & Tomasello, M. The emergence of contingent reciprocity in  
286 young children. *J. Exp. Child Psychol.* **116**, 338–350 (2013).

- 287 35. Hamlin, J. K., Wynn, K., Bloom, P. & Mahajan, N. How infants and toddlers  
288 react to antisocial others. *Proc Natl Acad Sci USA* **108**, 19931–19936 (2011).
- 289 36. Martin, A. & Olson, K. R. Beyond good and evil: what motivations underlie  
290 children’s prosocial behavior? *Perspect. Psychol. Sci.* **10**, 159–175 (2015).
- 291 37. Olson, K. R. & Spelke, E. S. Foundations of cooperation in young children.  
292 *Cognition* **108**, 222–231 (2008).
- 293 38. Lu, H. J. & Chang, L. Resource allocation to kin, friends, and strangers by 3-  
294 to 6-year-old children. *J. Exp. Child Psychol.* **150**, 194–206 (2016).
- 295 39. Bruce Morton, J. & Munakata, Y. Are you listening? Exploring a  
296 developmental knowledge-action dissociation in a speech interpretation task. *Dev. Sci.* **5**,  
297 435–440 (2002).
- 298 40. Tomasello, M. & Gonzalez-Cabrera, I. The role of ontogeny in the evolution  
299 of human cooperation. *Hum. Nat.* **28**, 274–288 (2017).
- 300 41. Plotnik, J. M., Lair, R., Suphachoksakun, W. & de Waal, F. B. M. Elephants  
301 know when they need a helping trunk in a cooperative task. *Proc Natl Acad Sci USA*  
302 **108**, 5116–5121 (2011).
- 303 42. Rekers, Y., Haun, D. B. M. & Tomasello, M. Children, but not chimpanzees,  
304 prefer to collaborate. *Curr. Biol.* **21**, 1756–1758 (2011).
- 305 43. Warneken, F., Lohse, K., Melis, A. P. & Tomasello, M. Young children share  
306 the spoils after collaboration. *Psychol. Sci.* **22**, 267–273 (2011).
- 307 44. Thomas, M. G. *et al.* Kinship underlies costly cooperation in Mosuo villages.  
308 *R. Soc. Open Sci.* **5**, 171535 (2018).
- 309 45. Hirata, S. & Fuwa, K. Chimpanzees (*Pan troglodytes*) learn to act with other  
310 individuals in a cooperative task. *Primates.* **48**, 13–21 (2007).
- 311 46. Chopik, W. J. Associations among relational values, support, health, and well-

- 312 being across the adult lifespan. *Pers Relatsh* **24**, 408–422 (2017).
- 313 47. Vehrencamp, S. L. A model for the evolution of despotic versus egalitarian  
314 societies. *Animal Behaviour* **31**, 667–682 (1983).
- 315 48. Rousset, F. Genetic structure and selection in subdivided populations (MPB-  
316 40). *Genetic structure and selection in subdivided populations (MPB-40)* (2013).
- 317 49. Hamilton, W. D. & May, R. M. Dispersal in stable habitats. *Nature* **269**, 578–  
318 581 (1977).
- 319 50. Gifford-Smith, M. E. & Brownell, C. A. Childhood peer relationships: social  
320 acceptance, friendships, and peer networks. *J. Sch. Psychol.* **41**, 235–284 (2003).
- 321 51. Masten, A. S. & Coatsworth, J. D. The development of competence in  
322 favorable and unfavorable environments: Lessons from research on successful children.  
323 *American Psychologist* **53**, 205–220 (1998).
- 324 52. Wrzus, C., Hänel, M., Wagner, J. & Neyer, F. J. Social network changes and  
325 life events across the life span: a meta-analysis. *Psychol. Bull.* **139**, 53–80 (2013).
- 326 53. Boulton, M. J. & Underwood, K. BULLY/VICTIM PROBLEMS AMONG  
327 MIDDLE SCHOOL CHILDREN. *British Journal of Educational Psychology* **62**, 73–87  
328 (1992).
- 329 54. Olweus, D. Bully/victim problems among schoolchildren: Basic facts and  
330 effects of a school based intervention program. *The development and treatment of*  
331 *childhood aggression, 17* **17**, 411–448 (1991).
- 332 55. Ladd, G. W., Kochenderfer, B. J. & Coleman, C. C. Classroom peer  
333 acceptance, friendship, and victimization: distinct relation systems that contribute  
334 uniquely to children’s school adjustment? *Child Dev.* **68**, 1181–1197 (1997).
- 335 56. Engelmann, J. M., Over, H., Herrmann, E. & Tomasello, M. Young children  
336 care more about their reputation with ingroup members and potential reciprocators. *Dev.*



- 337        *Sci.* **16**, 952–958 (2013).
- 338        57.        Bélanger, M. J., Atance, C. M., Varghese, A. L., Nguyen, V. & Vendetti, C.
- 339        What will I like best when i'm all grown up? preschoolers' understanding of future
- 340        preferences. *Child Dev.* (2014). doi:10.1111/cdev.12282
- 341        58.        Tomasello, M. & Vaish, A. Origins of human cooperation and morality. *Annu.*
- 342        *Rev. Psychol.* **64**, 231–255 (2013).
- 343        59.        Heinsohn, R. & Johnstone, R. A. Reproductive skew. *Ecology and evolution*
- 344        *of cooperative breeding in birds* (2004).

345 **Acknowledgments**

346 We thank parents of participants, directors, teachers and inspectors of the schools for  
347 permission to work in schools and children who participated in the study. We thank Orlane  
348 Scelsi for her drawing of the apparatus, David Lieuré for help adapting and building the  
349 apparatus for children and Bruce Lyon and Michael Singer for helpful feedback on the  
350 manuscript. ANR-Labex TULIP (ANR-10-LABX-41) New Frontiers Grant entitled “Human  
351 Altruism Genes” and the Institute for Advanced Studies in Toulouse provided funding. This  
352 work was supported by the Laboratoire d'Excellence (LABEX) entitled TULIP (ANR-10-  
353 LABX-41) and IAST through ANR grant ANR-17-EURE-0010 (Investissements d'Avenir  
354 program).

355 **Author Contributions**

356 G. B. -J., A. S. C, M.B and A.H. designed research; G. B. -J and A. R. performed research;  
357 M. C. and G. B. -J. analyzed data; G.B.-J, A.S.C and M.C. wrote the paper; M. B. and A.H.  
358 gave feedback on the paper.

359 **Additional Information**

360 Supplementary Information is available for this paper. Correspondence and requests for  
361 materials should be addressed to Gladys Barragan-Jason.

362 **Email:** [gladys.barraganjason@gmail.com](mailto:gladys.barraganjason@gmail.com)

363 **Running Head:** Non-kin cooperation in schoolchildren

364 **Keywords**

365 Cooperation, Reciprocity, Kin selection, Evolution, Children

366 **Methods**

367 *Participants*

368 We recruited 290 children from ages 3 to 10 (92 3-to-5 year-olds, 139 6-7 year-olds and 59 8-  
369 to-10 year-olds; 135 females) from 15 kindergartens and elementary schools in southwestern  
370 France. All parents signed an informed consent form for their children and only children who  
371 gave their verbal assent were included. Parents also filled a demographic questionnaire  
372 including parents' income, living area (urban vs. rural), number of siblings and native  
373 language. Thirty percent of children were from middle-class backgrounds (20,000 to 30,000  
374 euros/year) and 35 % lived in urban areas. Participants had 2.5 siblings on average: 18% were  
375 an only child, 44% had only one sibling, 20% had two siblings and 18% had more than 2  
376 siblings. Sixty-nine percent of the children were native French and all children (except 2  
377 children from whom the test was performed in English) were French-speaking. The same  
378 female experimenter tested children during a single video-recorded session in an available  
379 room at their schools.

380 *Experimental procedure*

381 Participants performed a rope pulling task<sup>1</sup>. This task requires coordinated pulling to  
382 reach a reward (see Fig. 1 and Fig. S1). Two children are required to pull their end of the rope  
383 simultaneously, each holding the end of the same rope where the two ends are far enough  
384 apart that one person could not reach both ends at the same time. A single rope is threaded  
385 around an apparatus such that only if both rope ends are pulled at the same time can the  
386 containers be moved and the rewards be reached. Pulling on one end would only move the  
387 rope but not the two sliding containers which contain the rewards, making the other end of  
388 the rope unavailable to a partner. Only if both participants pulled the rope at the same time  
389 and at similar speeds, would they each obtain a reward. Two cases lead to failure in the  
390 cooperative task: asymmetric pulling led to neither participant obtaining the reward (0/0) or if

391 both participants pulled at the same time but one let go too quickly, then just one of the two  
392 obtained the reward (0/1 or 1/0).

393 The Experimenter (E) explained to the children that they would play together to win  
394 a reward (stickers) but provided no further instruction. By not providing more guidance, this  
395 cooperative task was rendered more difficult than previous studies (63% here vs. 94% during  
396 first trial in a previous study<sup>2</sup>). E placed the two rewards (one for each child) in the  
397 apparatus (one in each container of the apparatus) under observation of the children and told  
398 them they could start to play. The partners of a dyad could be either siblings, best friends  
399 (someone they frequently play and interact with), or non friends (someone they know but do  
400 not particularly interact with). The status of the dyad (i.e., siblings, friends, non-friends) was  
401 determined before conducting the experiment by asking the children's teachers to name the  
402 friends of the participants and specifying each participant's best friend through a  
403 questionnaire filled out before the experiment. We asked teachers to base their estimation of  
404 relationship closeness of a dyad on the amount of time children spent together, intensity of  
405 positive interactions, and time they play with each other at school<sup>3,4</sup>. Based on the responses  
406 of the questionnaires, dyads were formed by E. Only reciprocal relationships were included  
407 meaning that each individual was considered the best friend or not-friend of the other. In  
408 order to check the accuracy of the teachers' rating, E subsequently asked children about their  
409 relationship with their partner ("Do you like to play with CHILD X?") and about the quality  
410 of such relationship using an emoticon Likert scale ("How much do you like to play with  
411 CHILD X?: a lot, a little, not at all). The order of the emoticons was counterbalanced across  
412 participants to avoid bias. In order to investigate whether participation in the rope pulling task  
413 affected the relationship of the partners, the same questions were administered 24 h after the  
414 test. Finally, we gathered information about each child's friend network before the  
415 experiment, by asking the child to name their friends ("Please, tell me the names of the

416 children you like to play with the most?”). Due to logistical constraints, we were only able to  
417 gather complete friendship network data at 10 schools of the 15 schools in our sample.

418 Each time a pair attempted to pull the ropes is termed a “trial”. Dyads of children  
419 could perform a maximum of 3 trials beyond which E stopped the testing and gave the  
420 stickers to the children. Overall, most children succeed within those 3 trials as only 14 dyads  
421 failed. Overall the sample included 39 pairs of siblings, 52 pairs of friends, and 54 pairs of  
422 non-friends who performed 77, 71 and 67 trials respectively, corresponding to a total of 215  
423 trials among 145 dyads.

#### 424 *Data coding*

425 All trials were recorded using a video camera oriented so that both participants and the  
426 apparatus were visible allowing us to score the children’s performances. Successful trials  
427 were scored when both partners pulled together and successfully reached the reward. Failed  
428 trials were scored when children failed to pull the rope together such that neither reached the  
429 reward or when only one child reached the reward. The same trained research assistant coded  
430 the number of gazes (each movement of the eyes accompanied by a movement of the head  
431 toward the partner) of each dyad during the first trials. The number of gazes include  
432 situations when both partners look at each other and when a single individual looks at the  
433 other one.

#### 434 *Statistical analysis*

435 All analyses were performed in the R environment for statistical computing version  
436 3.3.6 (R Development Core Team, 2018).

437 We first investigated whether overall performance was impacted by individuals’  
438 socio-demographic variables using generalized linear mixed models with a binary response  
439 (1: success, 0: failure;<sup>5</sup> including parents’ income (low class, middle class, high class), living

440 area (urban vs. rural), number of siblings (“0”, “1”, “2” or more than 2), age in months and  
441 sex as fixed factors and the participant as a random factor. We also investigate the effect of  
442 these demographic variables on performance on the first trial using a binomial GLM.

443 We then looked at the effect of partner relationship on the number of trials before  
444 success using an ordered logistic regression (“polr” function) with ordered responses (1:  
445 success after 1 trial; 2: success after 2 trials, 3: success after 3 trials or failure). We built a full  
446 model that included fixed effects of dyad relationship (kin, friend, non-friend), average age of  
447 partners, age difference between the partners and sex of the dyad (male-male, female-female,  
448 male-female).

449 We then examined the effect of partner relationship within a dyad on cooperation  
450 using a binomial GLM including the first trial (0 vs. 1) performed by each dyad. We built a  
451 full model that included fixed effects of dyad relationship (kin, friend, non-friend), dyad sex  
452 (male-male, female-female, male-female), average age of partners and age difference  
453 between the partners. We also looked at the impact of gaze frequency (gazes/second) using a  
454 GLM including the first trial (0 vs. 1) performed by each dyad. We built a full model that  
455 included fixed effects of dyad relationship (kin, friend, non-friend), dyad sex (male-male,  
456 female-female, male-female), average age of partners and age difference between the  
457 partners. We also investigated the effect of partner status on the number of gazes using a LM  
458 including gaze frequency (gaze per second) during the first trial. We included dyad  
459 relationship (kin, friend, non-friend), dyad sex (male-male, female-female, male-female),  
460 average age of partners and age difference between the partners as fixed effects.

461 We assessed the relationship between performance in the cooperative task and the size  
462 of a child’s social network. Using a binomial GLM, we asked whether performance (0 vs. 1)  
463 during the first trial was affected by a child’s number of friends (i.e. outdegree centrality in

464 social network analysis) while controlling for dyad sex, mean age of the dyad, age difference  
465 of the dyad partners, and number of children in the classroom.

466 For GLMs, visual inspection of residual plots using the DHARMA package <sup>6</sup> did not  
467 reveal deviations from homoscedasticity or normality. For each fixed effect, statistical  
468 significance was evaluated by likelihood ratio tests of the full model against the same model  
469 without the tested fixed effect. We report likelihood ratio F values or deviance and P-values  
470 as well as marginal, conditional or pseudo R<sup>2</sup> of the Full Model when appropriate.

471 Finally, we tested the effect of the cooperative task on the quality of the relationship  
472 between the two partners, we performed McNemar and Cochran Q test when appropriate on  
473 kin, friend and non-friend partners separately.

#### 474 **Methods References**

- 475 1. Plotnik, J. M., Lair, R., Suphachoksahakun, W. & de Waal, F. B. M. Elephants know  
476 when they need a helping trunk in a cooperative task. *Proc Natl Acad Sci USA* **108**, 5116–  
477 5121 (2011).
- 478 2. Warneken, F., Lohse, K., Melis, A. P. & Tomasello, M. Young children share the spoils  
479 after collaboration. *Psychol. Sci.* **22**, 267–273 (2011).
- 480 3. Howes, C. & Phillipsen, L. Gender and friendship: relationships within peer groups of  
481 young children. *Social Development* **1**, 230–242 (1992).
- 482 4. Howes, C. The earliest friendships. *The company they keep: Friendship in childhood and*  
483 *adolescence* 66–86 (1996).
- 484 5. Bates, D., Maechler, M., Bolker, B. & Walker, S. Package “lme4.” *Convergence*, **12**,  
485 (2015).
- 486 6. Hartig, F. DHARMA: residual diagnostics for hierarchical (multi-level/mixed) regression  
487 models. *R package version 0.1*, **5**, (2017).
